# Supplementary material for: Antitumor activities of a defucosylated anti-EpCAM monoclonal antibody in colorectal carcinoma xenograft models
Source: PubMed Central journal article supplement — Int J Mol Med. 2023 Jan 18;51(2):18. doi: 10.3892/ijmm.2023.5221 (PMC9869728; doi:10.3892/ijmm.2023.5221), 2023-01-18

Figure S1. Flow cytometry using EpMab-37-mG<sub>2a</sub>-f. (A) CHO-K1 (black) and CHO/EpCAM (red) cells were treated with the indicated concentrations of EpMab-37-mG<sub>2a</sub>-f. (B) BINDS-16 (tumors derived from Caco-2 cells in which EpCAM was knocked out) (black) and Caco-2 (red) cells were treated with the indicated concentrations of EpMab-37-mG<sub>2a</sub>-f. Subsequently, cells were incubated in Alexa Fluor 488-conjugated anti-mouse IgG for 30 min at 4°C. Fluorescence data were collected using the SA3800 Cell Analyzer and analyzed by SA3800. CHO, Chinese hamster ovary; EpCAM, epithelial cell adhesion molecule.

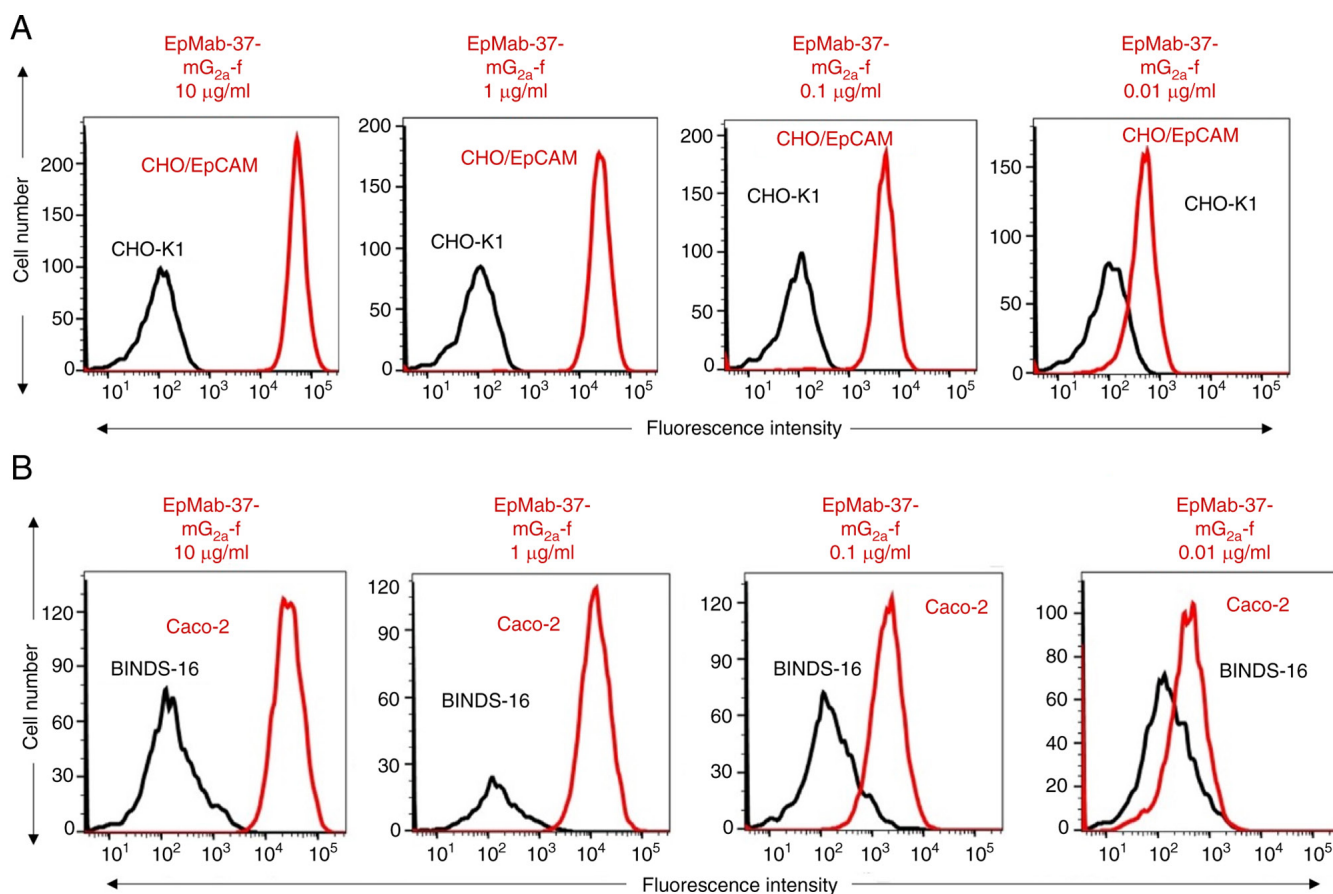

Figure S2. Flow cytometry using EpMab-37-mG<sub>2a</sub>-f. Colorectal carcinoma cells were treated with 10  $\mu$ g/ml EpMab-37-mG<sub>2a</sub>-f (red) or buffer control (black), followed by Alexa Fluor 488-conjugated anti-mouse IgG. Fluorescence data were analyzed using the EC800 Cell Analyzer.

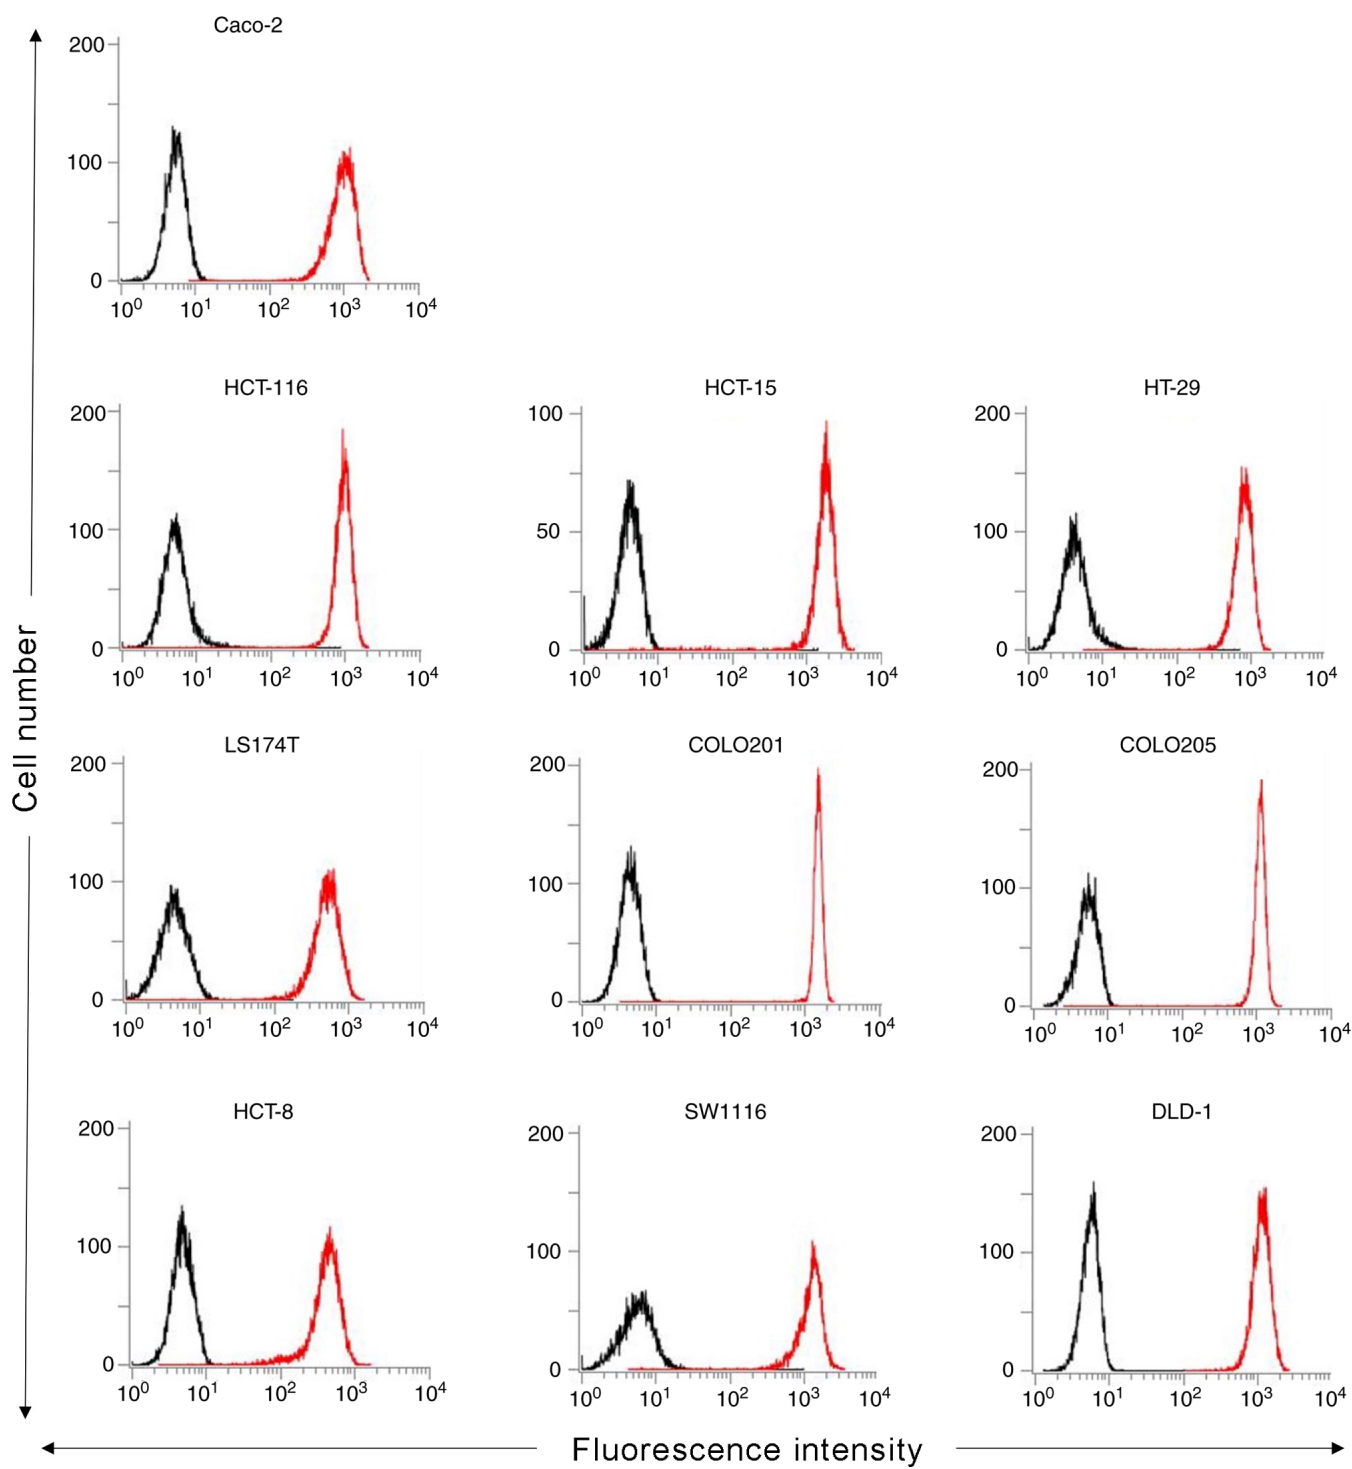

Supplement: Supplementary_Data.pdf [file Supplementary_Data.pdf]
